# Supplementary material for: Adipose stem cells from patients with Crohn’s disease show a distinctive DNA methylation pattern
Source: PubMed Central journal article supplement (PMC7137346; doi:10.1186/s13148-020-00843-3), 2020-04-06
Supplement: 13148_2020_843_MOESM3_ESM.pdf [file 13148_2020_843_MOESM3_ESM.pdf]

**Supplementary Table S1. Demographic and clinical characteristics** of cohort I: methylation study in adipose-stem cells.

|                                   | Control     | CD                       |
|-----------------------------------|-------------|--------------------------|
| <b>n</b>                          | 5           | 7                        |
| <b>Sex (male/female)</b>          | 2/3         | 4/3                      |
| <b>Age (y)</b>                    | 38 ± 4.6    | 36.1 ± 9.4               |
| <b>BMI (kg/m<sup>2</sup>)</b>     | 24.65 ± 3.6 | 22.9 ± 4.8               |
| <b>Smoking, n (%)</b>             | 3 (60)      | 5 (71.4)                 |
| <b>Glucose (mg/dL)</b>            | 81.5 ± 5.4  | 77 ± 7.7                 |
| <b>Cholesterol (mg/dL)</b>        | 115 ± 13.5  | 130 ± 20.3               |
| <b>HDL (mg/dL)</b>                | 39.3 ± 5.5  | 41.8 ± 4.6               |
| <b>Triglycerides (mg/dL)</b>      | 98.7 ± 4.5  | 95 ± 9.4                 |
| <b>Insulin (µIU/mL)</b>           | 2.1 ± 0.5   | 7.6 ± 2.4 <sup>a</sup>   |
| <b>HOMA-IR</b>                    | 0.51 ± 0.2  | 1.75 ± 0.55 <sup>a</sup> |
| <b>Age of diagnosis</b>           | -           | 25.1 ± 9.4               |
| <b>Disease location, n (%)</b>    |             |                          |
| L1 ileal                          | -           | 6 (86)                   |
| L2 colonic                        | -           | 0 (0)                    |
| L3 ileocolonic                    | -           | 1(14)                    |
| <b>Disease behavior,n (%)</b>     |             |                          |
| B1 nonstricturing, nonpenetrating | -           | 1 (14)                   |
| B2 stricturing                    | -           | 3 (43)                   |
| B3 penetraiting                   | -           | 3 (43)                   |
| <b>Immunomodulator use</b>        | -           | 7/7                      |
| <b>Biological agent treatment</b> | -           | 1/7                      |
| <b>Steroid treatment</b>          | -           | 6/7                      |
| <b>C-reactive protein (mg/dL)</b> | 0.3 ± 0.10  | 3.3 ± 1.3 <sup>a</sup>   |
| <b>Fecal calprotectin (µg/g)</b>  | -           | 1560 ± 230 <sup>a</sup>  |

Abbreviations: CD; Crohn's Disease; BMI, body mass index; HDL, high-density lipoprotein cholesterol; HOMA-IR, insulin resistance index.

Results are presented as mean ± SD. ANOVA followed by *post hoc* Bonferroni test was used to compare means between groups.

<sup>a</sup>*p* < 0.01 versus control-adipose stem cells.

**Supplementary Table S2. Demographic and clinical characteristics** of cohort II: gene expression study in adipose-stem cells.

|                                   | Control     | Inactive CD             | Active CD                   |
|-----------------------------------|-------------|-------------------------|-----------------------------|
| <b>n</b>                          | 10          | 10                      | 10                          |
| <b>Sex (male/female)</b>          | 4/6         | 5/5                     | 5/5                         |
| <b>Age (years)</b>                | 40 ± 5.3    | 38.2 ± 3.4              | 36.8 ± 10.4                 |
| <b>BMI (kg/m<sup>2</sup>)</b>     | 25.15 ± 2.1 | 24.59 ± 3.3             | 23.3 ± 3.3                  |
| <b>Smoking, n (%)</b>             | 5 (50)      | 6 (60)                  | 5 (50)                      |
| <b>Glucose (mg/dL)</b>            | 81.3 ± 3.9  | 86 ± 11.4               | 75 ± 10.7                   |
| <b>Cholesterol (mg/dL)</b>        | 115 ± 12.3  | 121 ± 20.4              | 141 ± 16.3 <sup>a</sup>     |
| <b>HDL (mg/dL)</b>                | 36.7 ± 5.6  | 44.7 ± 3.2 <sup>a</sup> | 41.4 ± 5.4                  |
| <b>Triglycerides (mg/dL)</b>      | 100 ± 5.3   | 116 ± 13.1              | 95 ± 8.9                    |
| <b>Insulin (μU/mL)</b>            | 2.07 ± 0.9  | 5.05 ± 1.2              | 7.5 ± 1.4 <sup>a,b</sup>    |
| <b>HOMA-IR</b>                    | 0.49 ± 0.1  | 1.3 ± 0.5               | 1.65 ± 0.35 <sup>a</sup>    |
| <b>Age at diagnosis (years)</b>   | -           | 38 ± 8.6                | 27.9 ± 9.4                  |
| <b>Last attack (months)</b>       |             | 21 ± 7.4                |                             |
| <b>Disease location, n (%)</b>    |             |                         |                             |
| L1 ileal                          | -           | 6/10 (60)               | 7/10 (70)                   |
| L2 colonic                        | -           | 3/10 (30)               | 2/10 (20)                   |
| L3 ileocolonic                    | -           | 2/10 (20)               | 1/10 (10)                   |
| <b>Disease behavior, n (%)</b>    |             |                         |                             |
| B1 nonstricturing, nonpenetrating | -           | 0/10 (0)                | 0/10 (0)                    |
| B2 stricturing                    | -           | 5/10 (50)               | 4/10 (40)                   |
| B3 penetrating                    | -           | 5/10 (50)               | 6/10 (60)                   |
| <b>Indication of surgery</b>      | CoH         | CoH                     | 4SCD/6FCD                   |
| <b>Immunomodulator use</b>        | -           | 10/10                   | 10/10                       |
| <b>Biological agent treatment</b> | -           | 2/10                    | 2/10                        |
| <b>Steroid treatment</b>          | -           | 4/10                    | 8/10                        |
| <b>C-reactive protein (mg/dL)</b> | 0.2 ± 0.04  | 0.3 ± 0.13              | 3.4 ± 1.6 <sup>a,b</sup>    |
| <b>Fecal calprotectin (μg/g)</b>  | -           | 81.25 ± 20.3            | 2132.4 ± 159.1 <sup>b</sup> |

Abbreviations: BMI, body mass index; HDL, high-density lipoprotein cholesterol; CoH, cholecystectomy or hernia; CD; Crohn's Disease; SCD, stenotic Crohn's disease; FCD, fistulizing Crohn's disease.

Results are presented as mean ± SD. ANOVA followed by *post hoc* Bonferroni test was used to compare means between groups.

<sup>a</sup>*p* < 0.01 versus control-adipose stem cells.

<sup>b</sup>*p* < 0.05 versus inactive CD-adipose stem cells.

**Supplementary Table S3. Demographic and clinical characteristics** of cohort III: gene expression study in peripheral blood mononuclear cells.

|                                   | Control       | Inactive CD               | Active CD                  |
|-----------------------------------|---------------|---------------------------|----------------------------|
| <b>n</b>                          | 10            | 10                        | 10                         |
| <b>Sex (male/female)</b>          | 5/5           | 5/5                       | 5/5                        |
| <b>Age (y)</b>                    | 39.3 ± 6.9    | 38.8 ± 14.14              | 45.14 ± 18.14              |
| <b>BMI (kg/m<sup>2</sup>)</b>     | 24.4 ± 1.4    | 25.52 ± 5.22              | 23.06 ± 3.37               |
| <b>Smoking, n (%)</b>             |               |                           |                            |
| Active                            | 3 (30)        | 5 (50)                    | 3 (30)                     |
| Ex                                | 3 (30)        | 2 (20)                    | 3 (30)                     |
| No                                | 4 (40)        | 3 (30)                    | 4 (40)                     |
| <b>Glucose (mg/dL)</b>            | 75 ± 3.9      | 86.6 ± 10.13 <sup>a</sup> | 84.33 ± 11.29 <sup>a</sup> |
| <b>Cholesterol (mg/dL)</b>        | 139 ± 11.3    | 198 ± 52.09 <sup>a</sup>  | 164.75 ± 22.8 <sup>a</sup> |
| <b>Cholesterol-HDL (mg/dL)</b>    | 60.61 ± 20.15 | 64.22 ± 22.52             | 42 ± 15.55 <sup>a,b</sup>  |
| <b>Triglycerides</b>              | 123 ± 35.6    | 141 ± 43.8                | 106 ± 25.45                |
| <b>Age of diagnosis</b>           | -             | 19 ± 4.7                  | 22 ± 5.8                   |
| <b>Last attack (months)</b>       | -             | 20 ± 3.8                  | -                          |
| <b>Disease location, n (%)</b>    |               |                           |                            |
| L1 ileal                          | -             | 8 (80)                    | 10 (100)                   |
| L2 colonic                        | -             | 1 (10)                    | 0 (0)                      |
| L3 ileocolonic                    | -             | 1 (10)                    | 0 (0)                      |
| <b>Disease behavior, n (%)</b>    |               |                           |                            |
| B1 nonstricturing, nonpenetrating | -             | 6 (60)                    | 4 (40)                     |
| B2 stricturing                    | -             | 3 (30)                    | 3 (30)                     |
| B3 penetrating                    | -             | 1 (10)                    | 3 (30)                     |
| <b>Immunomodulator use</b>        | -             | 8/10                      | 7/10                       |
| <b>Biological agent treatment</b> | -             | 7/10                      | 6/10                       |
| <b>Steroid treatment</b>          | -             | 4/10                      | 4/10                       |
| <b>C-reactive protein (mg/dL)</b> | 0.14 ± 0.04   | 0.21 ± 0.07               | 3.4 ± 1.1 <sup>a,b</sup>   |
| <b>Fecal calprotectin (µg/g)</b>  | -             | 178.75 ± 23.4             | 2219 ± 117.15 <sup>b</sup> |

Abbreviations: BMI, body mass index; HDL, high-density lipoprotein cholesterol; CoH, cholecystectomy or hernia; CD; Crohn's Disease.

Results are presented as mean ± SD. ANOVA followed by *post hoc* Bonferroni test was used to compare means between groups.

<sup>a</sup>*p* < 0.01 versus control-peripheral mononuclear cells (PBMCs).

<sup>b</sup>*p* < 0.01 versus inactive CD-PBMCs.

**Supplementary Table S4. Immunophenotypic characterization of hASCs isolated from healthy control subjects, active CD and inactive CD patients.** The values reflect the mean  $\pm$ SD percentage surface positive staining of hASCs for a part of surface antigens including hematopoietic and stromal markers.

| Surface markers | Control        |                   | Inactive CD     |                             | Active CD       |                             |
|-----------------|----------------|-------------------|-----------------|-----------------------------|-----------------|-----------------------------|
|                 | %              | MFI               | %               | MFI                         | %               | MFI                         |
| CD34            | 0.2 $\pm$ 0.1  | 80 $\pm$ 9.2      | 0.91 $\pm$ 0.4  | 125 $\pm$ 10.7 <sup>a</sup> | 0.9 $\pm$ 0.5   | 200 $\pm$ 16.4 <sup>a</sup> |
| CD45            | 0.3 $\pm$ 0.25 | 110 $\pm$ 10.4    | 0.3 $\pm$ 0.19  | 87 $\pm$ 8.3                | 0.2 $\pm$ 0.15  | 90 $\pm$ 9.5                |
| CD90            | 95.3 $\pm$ 2.1 | 18800 $\pm$ 725.2 | 97.3 $\pm$ 2.4  | 22400 $\pm$ 888             | 97.9 $\pm$ 2    | 31000 $\pm$ 1025            |
| CD73            | 90 $\pm$ 7.2   | 9880 $\pm$ 200    | 86.5 $\pm$ 6.6  | 8400 $\pm$ 176              | 87.5 $\pm$ 8.1  | 5900 $\pm$ 110 <sup>a</sup> |
| CD36            | 40 $\pm$ 10.3  | 700 $\pm$ 25      | 32.5 $\pm$ 10.3 | 190 $\pm$ 30 <sup>a</sup>   | 30.5 $\pm$ 10.3 | 200 $\pm$ 45 <sup>a</sup>   |

Abbreviations: hASCs, human adipose derived stem cells; MFI, median fluorescence intensity.

ANOVA followed by post hoc Bonferroni test was used to compare means between groups. \* P < 0.05 versus Control-hASCs.

| Gene name | Detector                      |
|-----------|-------------------------------|
| C2        | <a href="#">Hs00918862_m1</a> |
| CHID1     | <a href="#">Hs01061050_m1</a> |
| DLX5      | <a href="#">Hs00193291_m1</a> |
| EBF3      | <a href="#">Hs01008793_m1</a> |
| EN1       | <a href="#">Hs00154977_m1</a> |
| FGF1      | <a href="#">Hs01092738_m1</a> |
| FGF13     | <a href="#">Hs01381548_m1</a> |
| FGFR2     | <a href="#">Hs01552918_m1</a> |
| G6PD      | <a href="#">Hs00166169_m1</a> |
| HOXB5     | <a href="#">Hs00357820_m1</a> |
| HOXB6     | <a href="#">Hs00980016_m1</a> |
| IKBKE     | <a href="#">Hs01063858_m1</a> |
| IKBKG     | <a href="#">Hs00415849_m1</a> |
| LTBR      | <a href="#">Hs01101194_m1</a> |
| NOTCH4    | <a href="#">Hs00965889_m1</a> |
| PRDM8     | <a href="#">Hs00220274_m1</a> |
| PRDM16    | <a href="#">Hs00223161_m1</a> |
| PTPRN2    | <a href="#">Hs00243067_m1</a> |
| RIPK1     | <a href="#">Hs01041869_m1</a> |
| SHROOM3   | <a href="#">Hs01068190_m1</a> |
| SPON2     | <a href="#">Hs00202813_m1</a> |
| TNF       | <a href="#">Hs00174128_m1</a> |
| WT1       | <a href="#">Hs01103751_m1</a> |

**Supplemental Table S5. Human gene expression analysis.** Results were calculated using the comparative Ct method and expressed relative to the expression of the housekeeping gene 18S (Hs03928985\_g1).



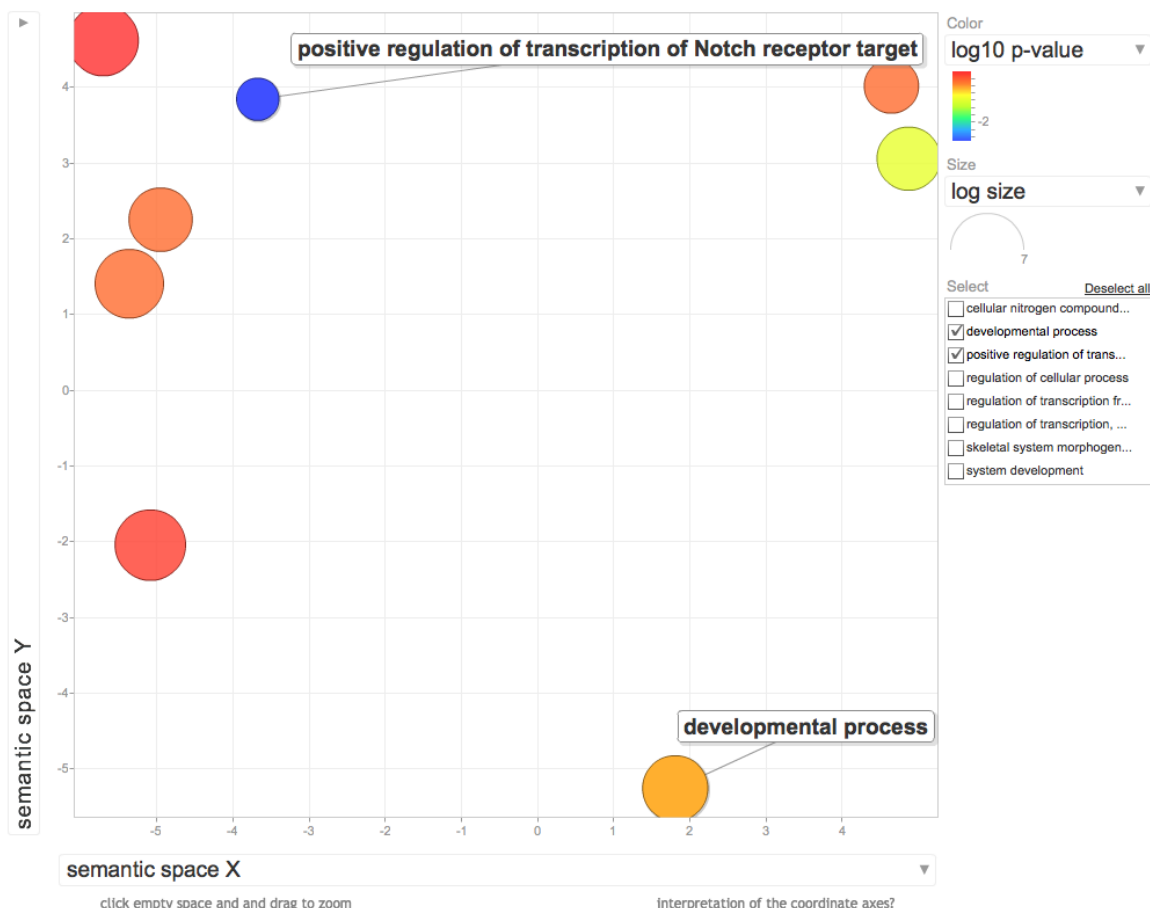

While parsing your data, warning(s) were encountered:  
 Could not parse GO ID from line: '#term ID false discovery rate'. Line will be skipped.

Hide/show dispensable GO terms

Export results to text table (CSV) Make R script for plotting

| term ID    | description                                                    | frequency | pin? | log <sub>10</sub> p-value | uniqueness | dispensability |
|------------|----------------------------------------------------------------|-----------|------|---------------------------|------------|----------------|
| GO:0007221 | positive regulation of transcription of Notch receptor target  | 0.002 %   |      | -2.2596                   | 0.58       | 0.00           |
| GO:0032502 | developmental process                                          | 2.812 %   |      | -1.5243                   | 0.89       | 0.00           |
| GO:0048731 | system development                                             | 1.264 %   |      | -1.6799                   | 0.43       | 0.05           |
| GO:0009653 | anatomical structure morphogenesis                             | 1.542 %   | 📌    | -1.3125                   | 0.46       | 0.84           |
| GO:0007389 | pattern specification process                                  | 0.147 %   | 📌    | -1.4271                   | 0.49       | 0.75           |
| GO:0030154 | cell differentiation                                           | 1.133 %   | 📌    | -1.4271                   | 0.43       | 0.79           |
| GO:0007399 | nervous system development                                     | 0.582 %   | 📌    | -1.4271                   | 0.45       | 0.86           |
| GO:0007275 | multicellular organism development                             | 1.559 %   | 📌    | -1.6615                   | 0.43       | 0.92           |
| GO:0044271 | cellular nitrogen compound biosynthetic process                | 22.502 %  |      | -1.3363                   | 0.59       | 0.13           |
| GO:0050794 | regulation of cellular process                                 | 18.840 %  |      | -1.3054                   | 0.49       | 0.21           |
| GO:0006357 | regulation of transcription from RNA polymerase II promoter    | 1.273 %   |      | -1.4271                   | 0.42       | 0.55           |
| GO:0006355 | regulation of transcription, DNA-templated                     | 9.917 %   |      | -1.4271                   | 0.32       | 0.66           |
| GO:0019219 | regulation of nucleobase-containing compound metabolic process | 10.258 %  | 📌    | -1.4271                   | 0.37       | 0.86           |
| GO:0031326 | regulation of cellular biosynthetic process                    | 10.816 %  | 📌    | -1.4271                   | 0.36       | 0.89           |
| GO:0051252 | regulation of RNA metabolic process                            | 10.029 %  | 📌    | -1.3696                   | 0.35       | 0.89           |
| GO:0006351 | transcription, DNA-templated                                   | 10.659 %  | 📌    | -1.4271                   | 0.47       | 0.88           |
| GO:2000112 | regulation of cellular macromolecule biosynthetic process      | 10.683 %  | 📌    | -1.4271                   | 0.35       | 0.88           |
| GO:0048705 | skeletal system morphogenesis                                  | 0.053 %   |      | -1.4271                   | 0.51       | 0.69           |

Did you find REVIGO useful in your work? Feel free to share it with your colleagues.

Like 201 Tweet

**Supplementary Figure S2. Functional analysis and visualization of genes down-regulated in adipose-stem cells isolated of CD patients.** The enriched pathways were visualized and the network analysis performed using REVIGO (<https://http://revigo.irb.hr/>), which summarizes and visualizes lists of gene ontology [GO] terms.

## A. Immune system

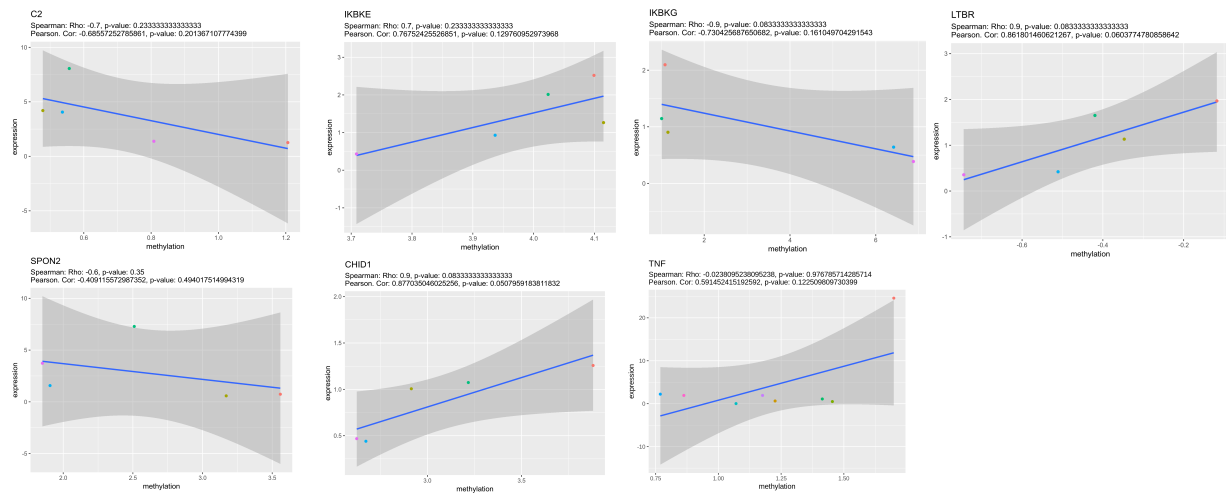

## B. Metabolic process

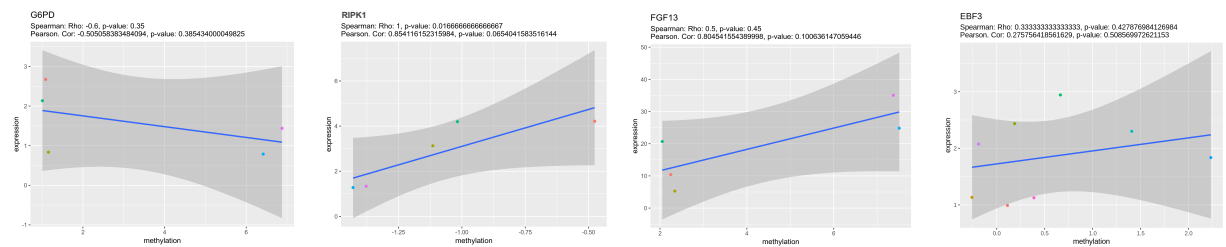

## C. Cell Differentiation

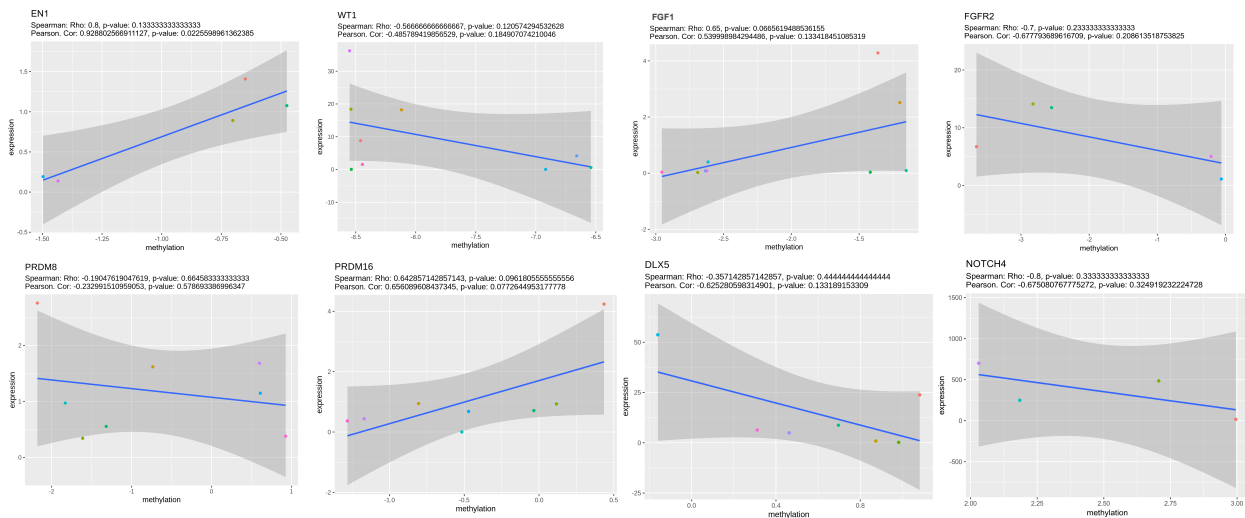

## D. Development process

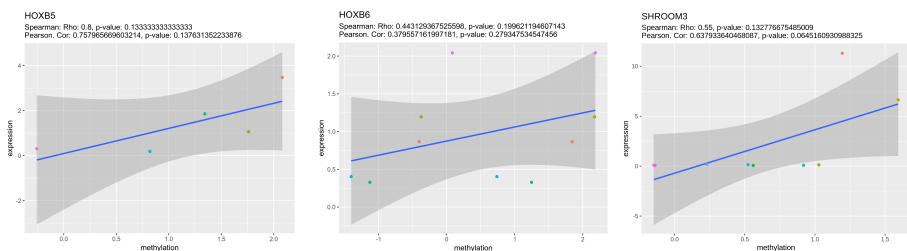

**Supplementary Figure S3. Pearson and Spearman correlations between gene expression and methylation data of candidate genes obtained from differentially methylated regions. (A) Genes involved in immune system response: *C2*, *IKBKE*, *IKBKG*, *LTBR*, *SPON2*, *CHD1* and *TNFA*. (B) Genes related to the regulation of metabolism: *G6PD*, *FGF13*, *EBF3*, *RIPK1*. (C) Genes related to cell differentiation: *EN1*, *WT1*, *FGF1*, *FGFR2*, *PRDM8*, *PRDM16* and *DLX5*.**



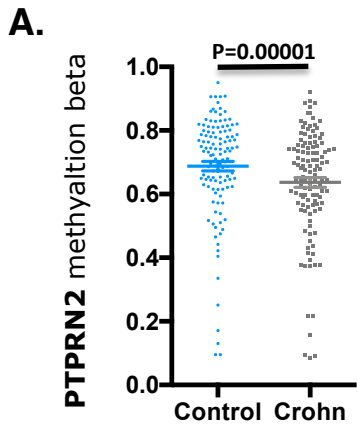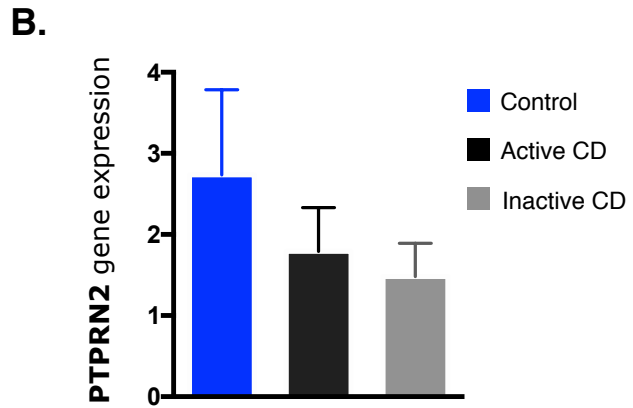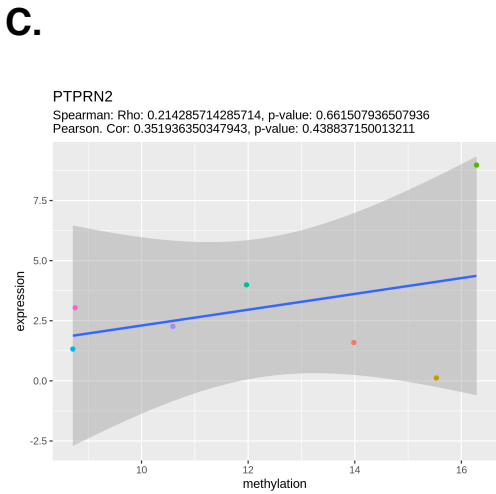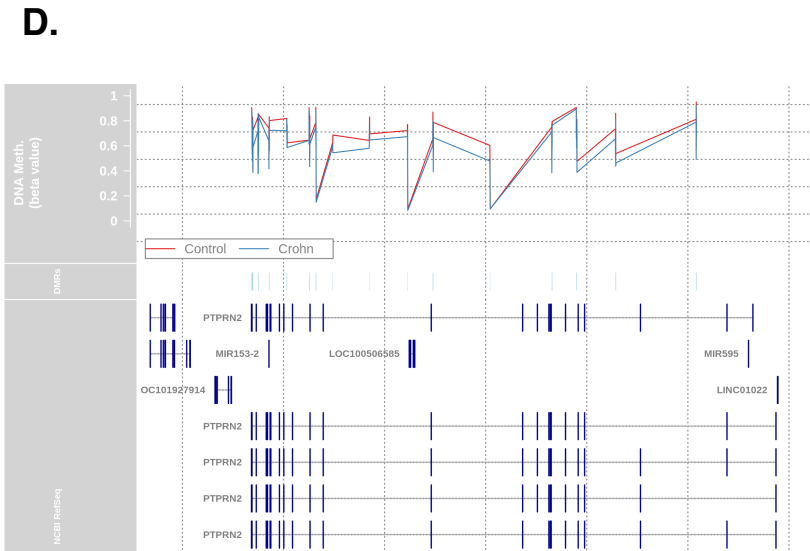

**Supplementary Figure S4. *PTPNR2* is hypomethylated in human adipose stem cells of patients with Crohn's disease but there is no correlation with gene expression.** Methylation (a) and mRNA levels (b) of *PTPNR2* in hASCs. (c) Spearman and Person's correlation between methylation and gene expression data. (d) DMR plot in *PTPNR2* gene.
